# Supplementary material for: MLST-based inference of genetic diversity and population structure of clinical Klebsiella pneumoniae, China
Source: PubMed Central journal article supplement (PMC5154592; doi:10.1038/srep07612), 2015-01-05
Supplement: srep07612-s1.pdf [file srep07612-s1.pdf]

## **Supplementary Information**

### **MLST-based inference of genetic diversity and population structure of clinical *Klebsiella pneumoniae*, China**

Chenyi Guo<sup>1</sup>, Xianwei Yang<sup>2</sup>, Yarong Wu<sup>2</sup>, Huiying Yang<sup>2</sup>, Yanping Han<sup>2</sup>, Ruifu Yang<sup>2</sup>,  
Liangping Hu<sup>1</sup>, Yujun Cui<sup>2</sup>, Dongsheng Zhou<sup>2</sup>

*1. Consulting Center of Biomedical Statistics, Beijing 100850, China; 2. State Key Laboratory of Pathogen and Biosecurity, Beijing Institute of Microbiology and Epidemiology, Beijing 100071, China*

**Table S1. Primers used in this study**

| <b>Locus</b> | <b>Length (bp)</b> | <b>Primers</b>                                                                       | <b>Annealing temperature</b> |
|--------------|--------------------|--------------------------------------------------------------------------------------|------------------------------|
| <i>gapA</i>  | 450                | KP-MLST-gapA-F: CCACTCACGGTCGTTTCG<br>KP-MLST-gapA-R: ATGGCTTTCTTGATTTCTTC           | 56°C                         |
| <i>infB</i>  | 318                | KP-MLST-infB-F: GACTACATTCGTTCTACCAAGG<br>KP-MLST-infB-R: CAAGGAAGGATTCGATGAC        | 56°C                         |
| <i>mdh</i>   | 477                | KP-MLST-mdh-F1: CGTTGTACGACATCGCTCC<br>KP-MLST-mdh-R1: CGGCTGGGAGAAGAAACG            | 59°C                         |
| <i>pgi</i>   | 432                | KP-MLST-pgi-F: TACAACAACCTTCTTCGGTGC<br>KP-MLST-pgi-R: AGGATGCGGTTAGCCAGC            | 59°C                         |
| <i>phoE</i>  | 420                | KP-MLST-phoE-F: TCTTCGGTCTGGTGGATGG<br>KP-MLST-phoE-R: GGTAAATCAGAACTGGTAGGTC        | 59°C                         |
| <i>recA</i>  | 347                | KP-MLST-recA-F1: GCAATTCGGTAAAGGCTCCATC<br>KP-MLST-recA-R1: GAACATCACGCCAATTTTCATACG | 59°C                         |
| <i>rpoB</i>  | 501                | KP-MLST-rpoB-F: CGTCGTATCTCCGCACTCG<br>KP-MLST-rpoB-R: CGGGTACATCTCGTCTTCG           | 53°C                         |

Note that the reference sequences of the former six loci are identical to those in the *K.*

*pneumoniae* MLST Database at Institut Pasteur

<http://www.pasteur.fr/recherche/genopole/PF8/mlst/Kpneumoniae.html>.

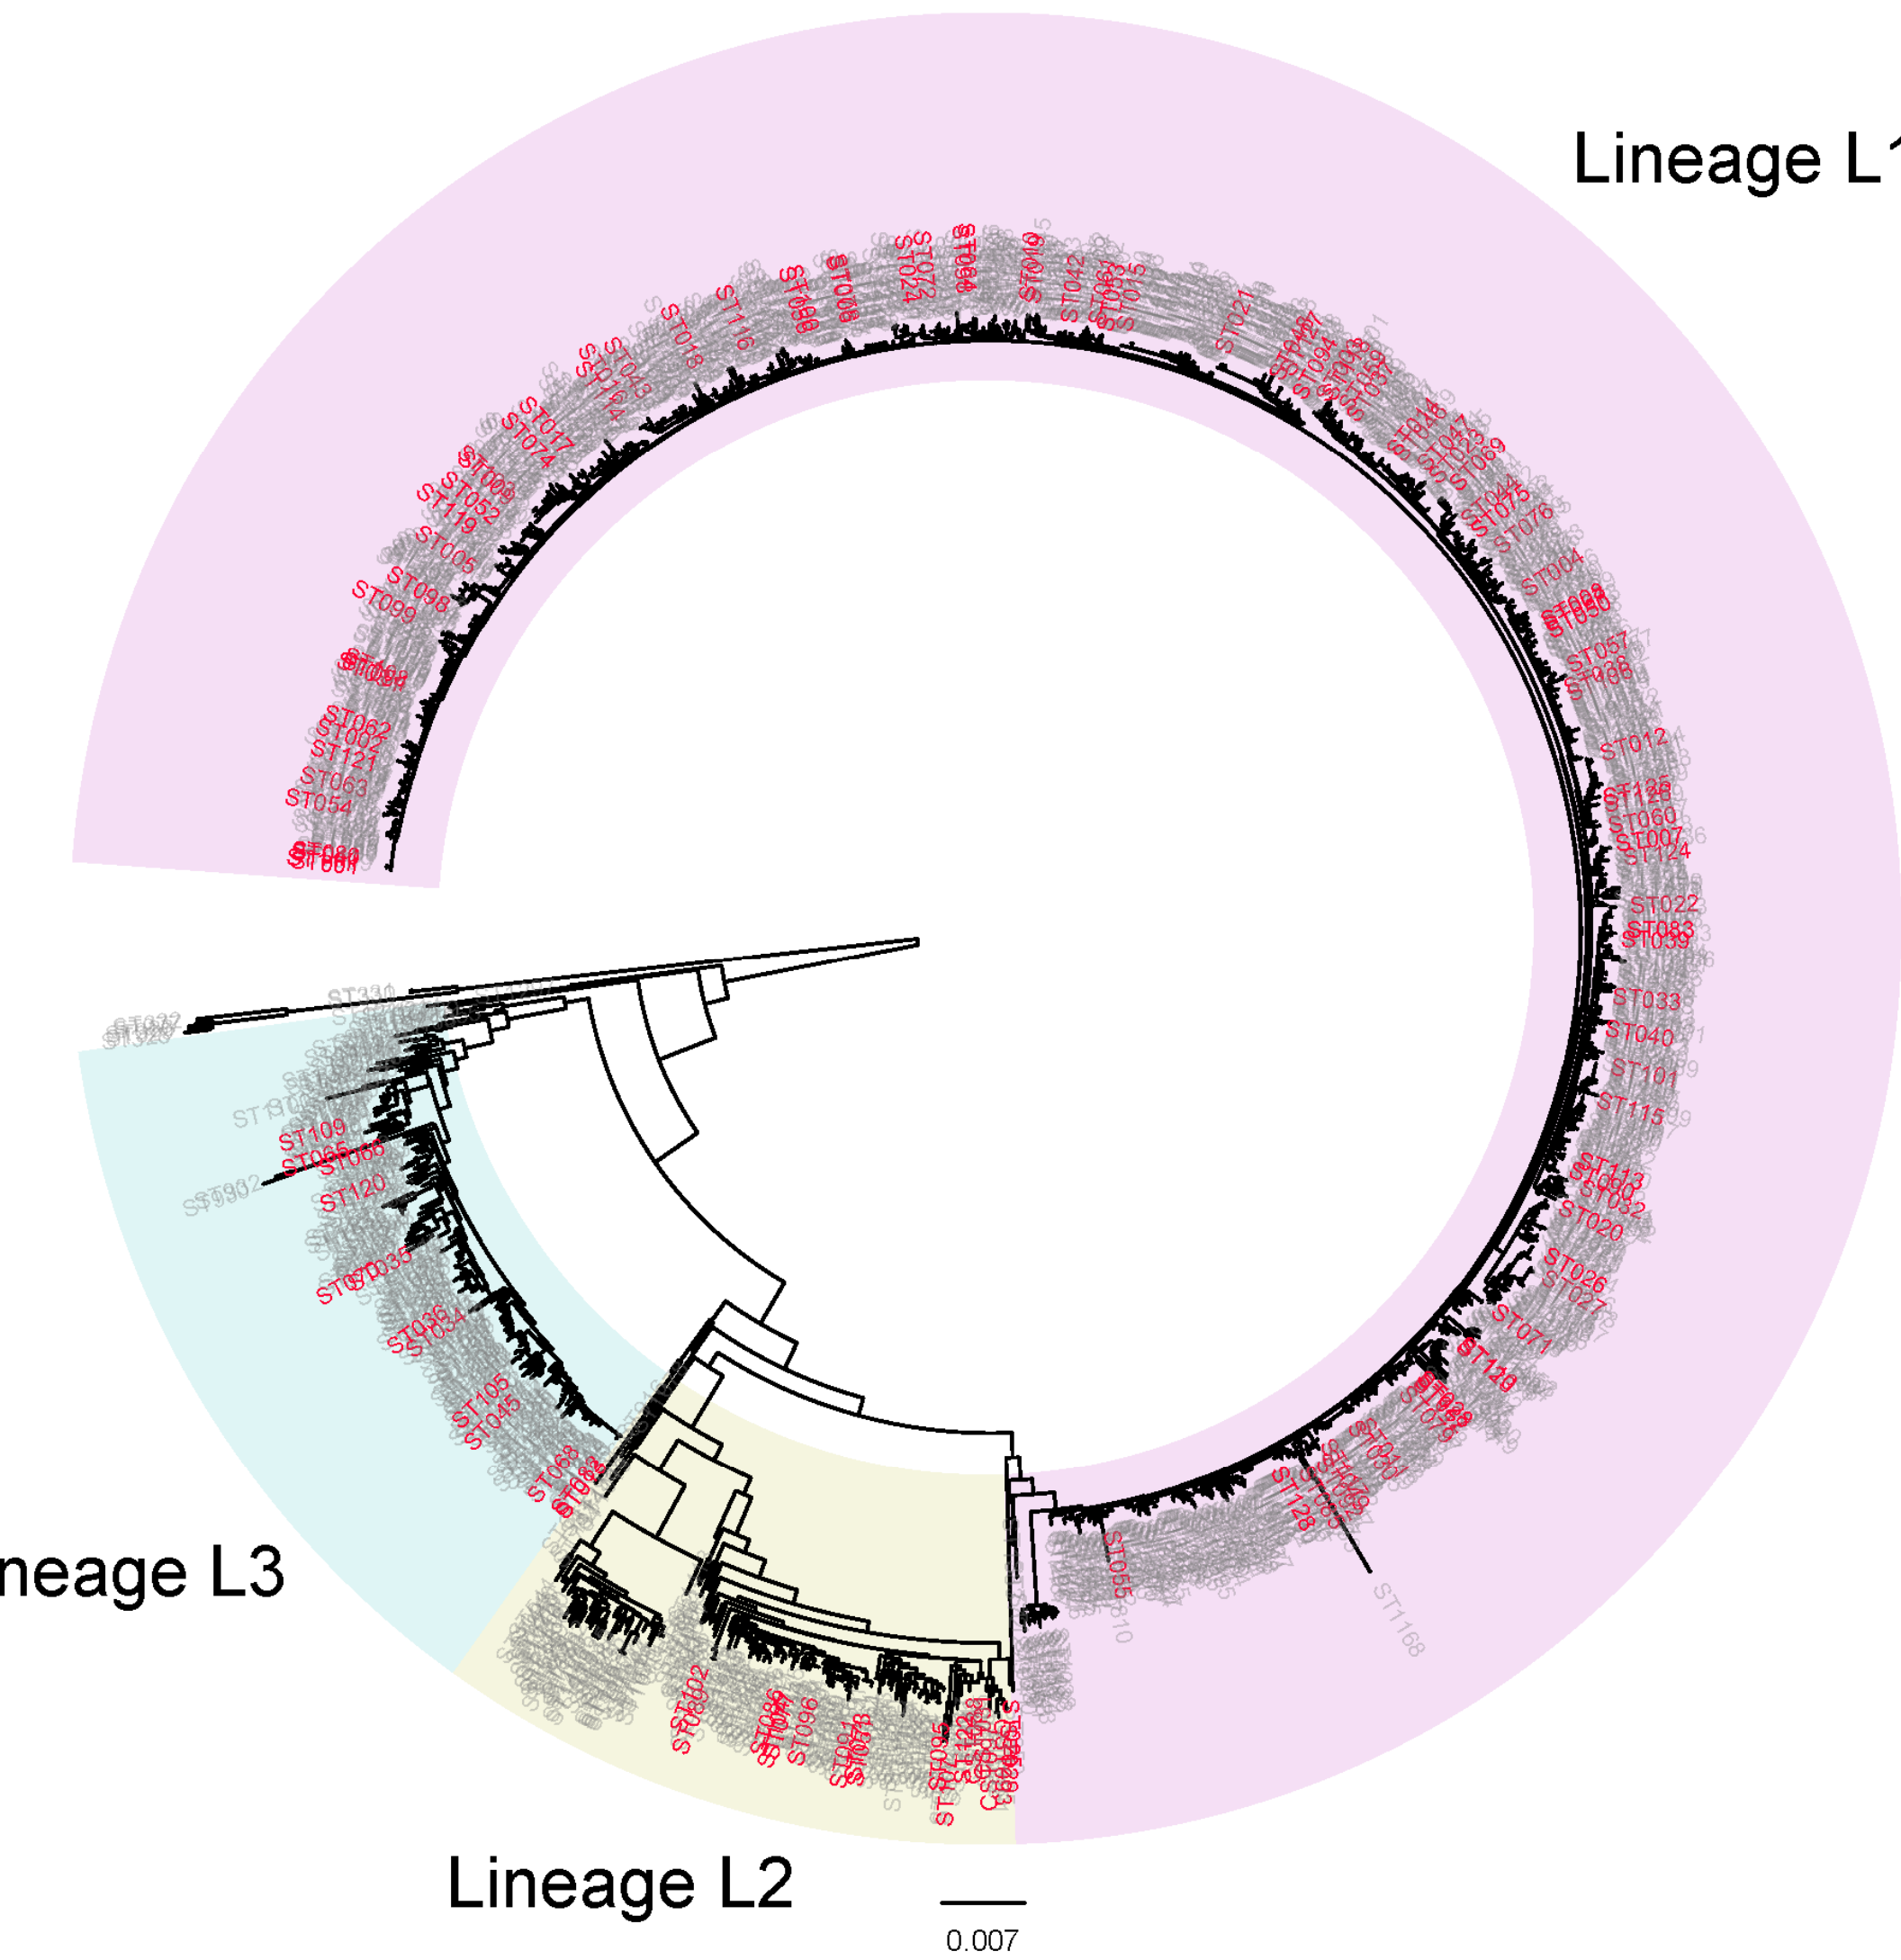

**Phylogenetic tree of 128 plus 1474 sequence types (STs).** The unrooted NJ tree was generated from the concatenated sequences of the six loci (*gapA*, *infB*, *mdh*, *pgi*, *sdhA*, *sdhB*). The 128 STs (red) in this study and the 1474 STs (grey) in the *K. pneumoniae* MLST Database at Institut Pasteur (<http://www.pasteur.fr/recherche/genopole/PF8/mlst/Kpneu>) (Clermont et al., 2014). STs belonged to the three distinct lineages (see text for details) were denoted with different background colors.

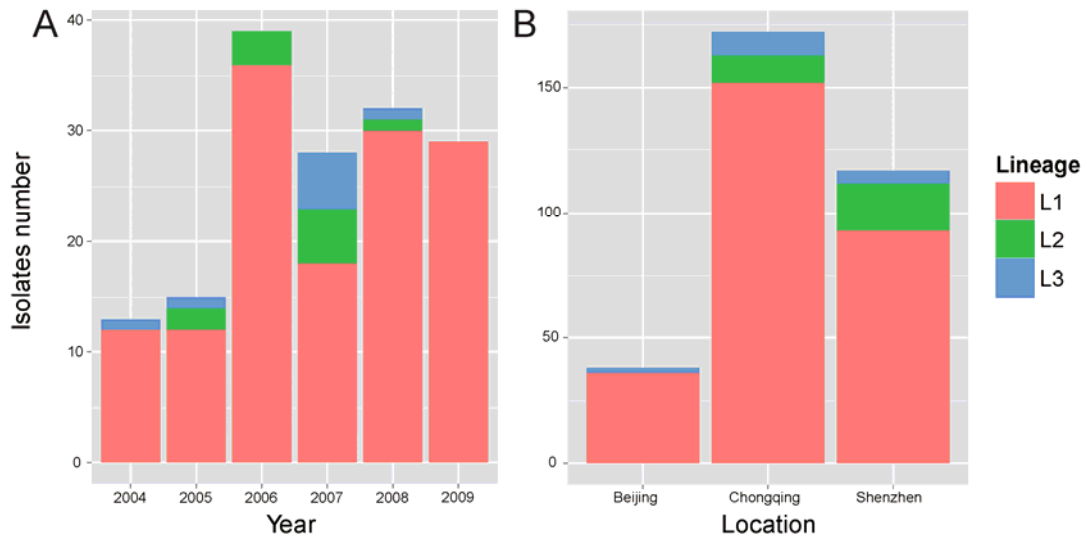

**Figure S2 Time and geographical distribution of three lineages.** A. Time distribution of 156/172 Chongqing isolates, which had isolating time and colored by lineages. B. Geographical distribution of all isolates colored by lineages.
